# Supplementary material for: Order–disorder phase transition coupled with torsion in tri-n-butylammonium trichloroacetate (TBAT)
Source: Royal Society of Chemistry journal article supplement (doi:10.1039/c5tc00989h), 2015-01-01
Supplement: c5tc00989h1.pdf [file c5tc00989h1.pdf]

**Supporting Information**

**Order-Disorder Phase Transition Coupled with Torsion in Tri-*n*-  
Butylammonium Trichloroacetate (TBAT)**

**Muhammad Adnan Asghar,<sup>ab</sup> Chengmin Ji,<sup>a</sup> Yuelan Zhou,<sup>a</sup> Zhihua Sun,<sup>a</sup> Tariq Khan,<sup>ab</sup>**

**Shuquan Zhang,<sup>a</sup> Sangen Zhao<sup>a</sup> and Junhua Luo<sup>a\*</sup>**

<sup>a</sup> *Key Laboratory of Optoelectronic Materials Chemistry and Physics, Fujian Institute of Research on the Structure of Matter, Chinese Academy of Sciences, Fuzhou, Fujian, 350002, P. R. China. E-mail: [jhluo@fjirsm.ac.cn](mailto:jhluo@fjirsm.ac.cn). Fax: (+86) 0591-83730955. Tel: (+86) 0591-83730955.*

<sup>b</sup> *University of Chinese Academy of Sciences, Beijing 100049, China.*

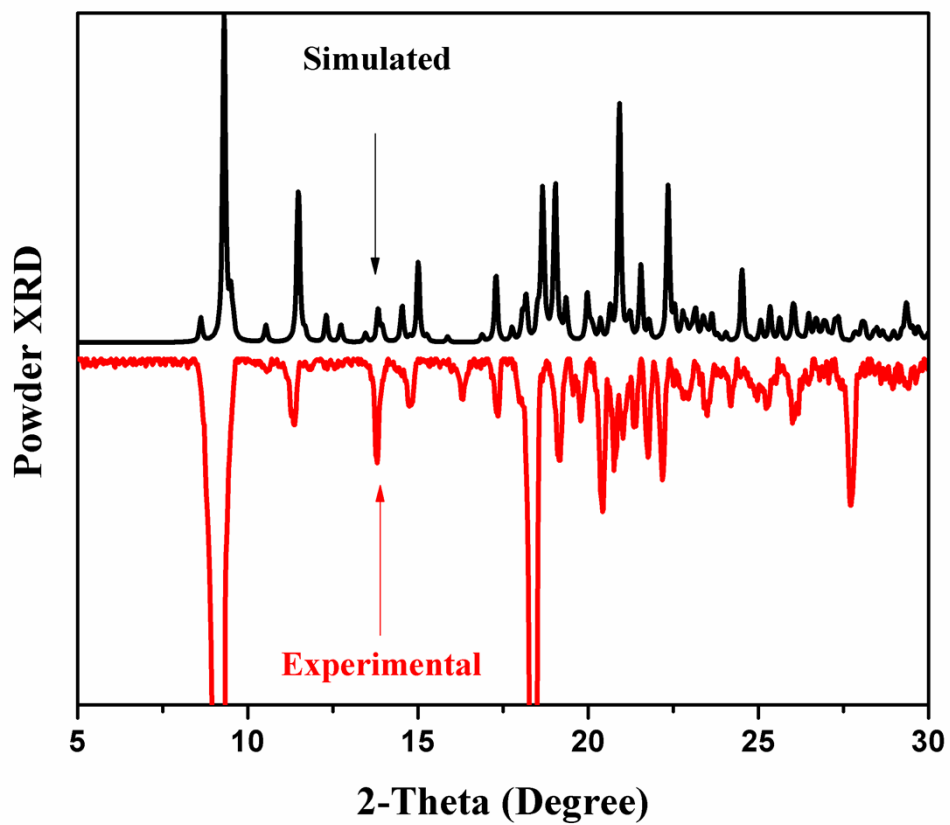

Figure S1. PXRD patterns of TBAT.

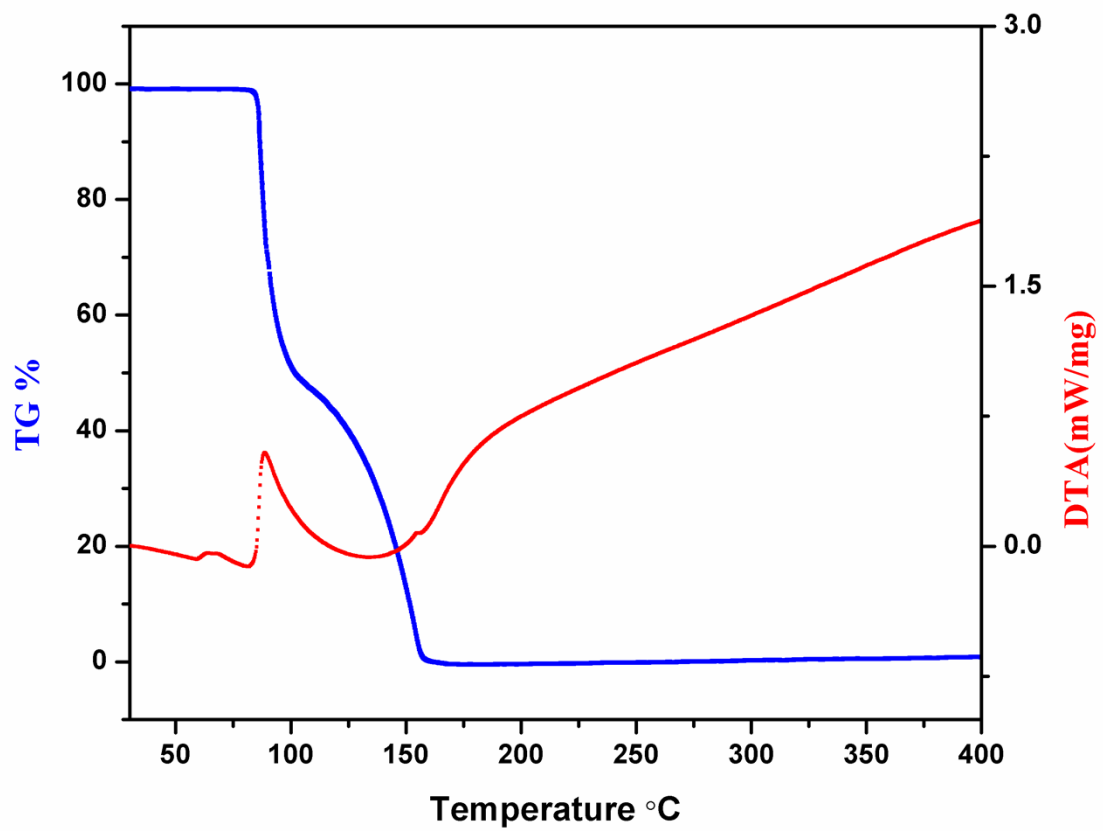

**Figure S2.** TG-DTA curves of TBAT.

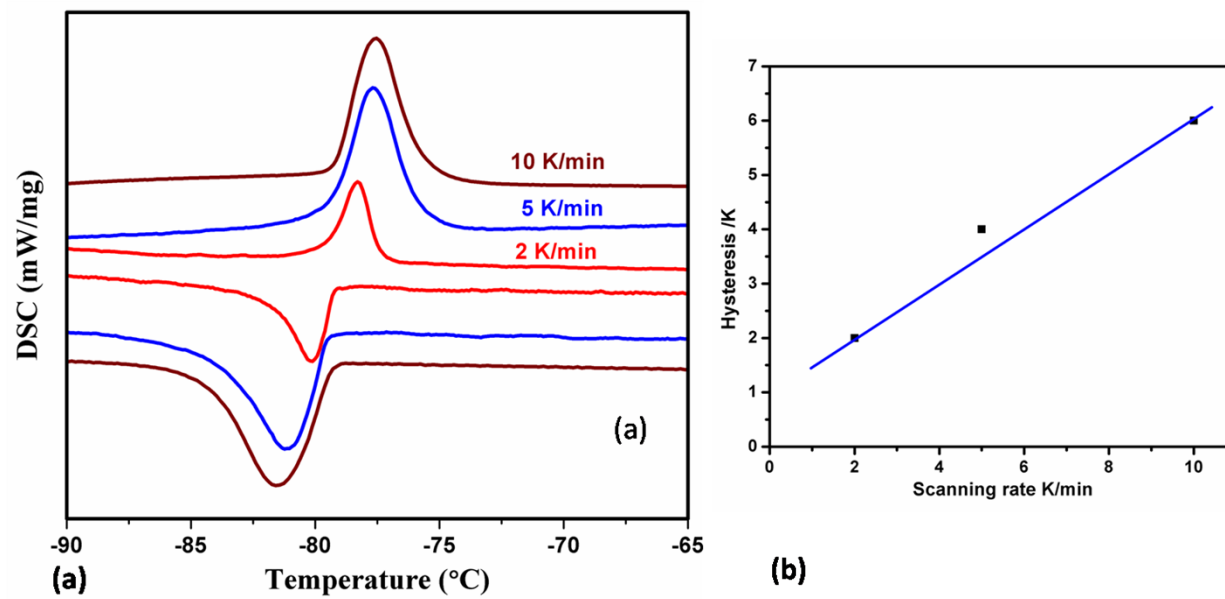

**Figure S3.** DSC curves of TBAT at (a) different scanning rates and (b) thermal hysteresis from the scans.

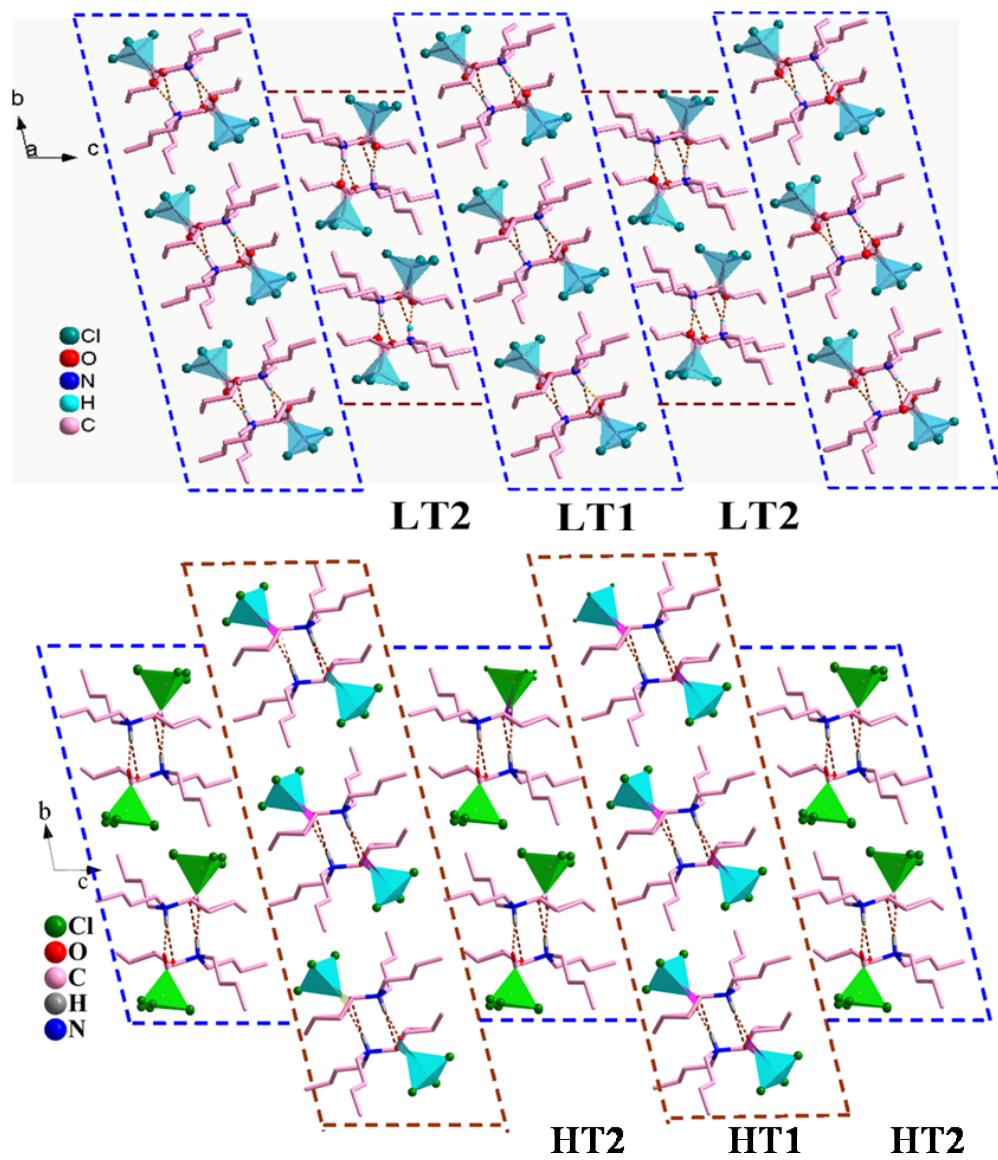

**Figure S4.** Unit cell packing diagrams viewed along the a-axis at (a) 100 and (b) 220 K of TBAT. The dotted lines stand for the hydrogen bonds.

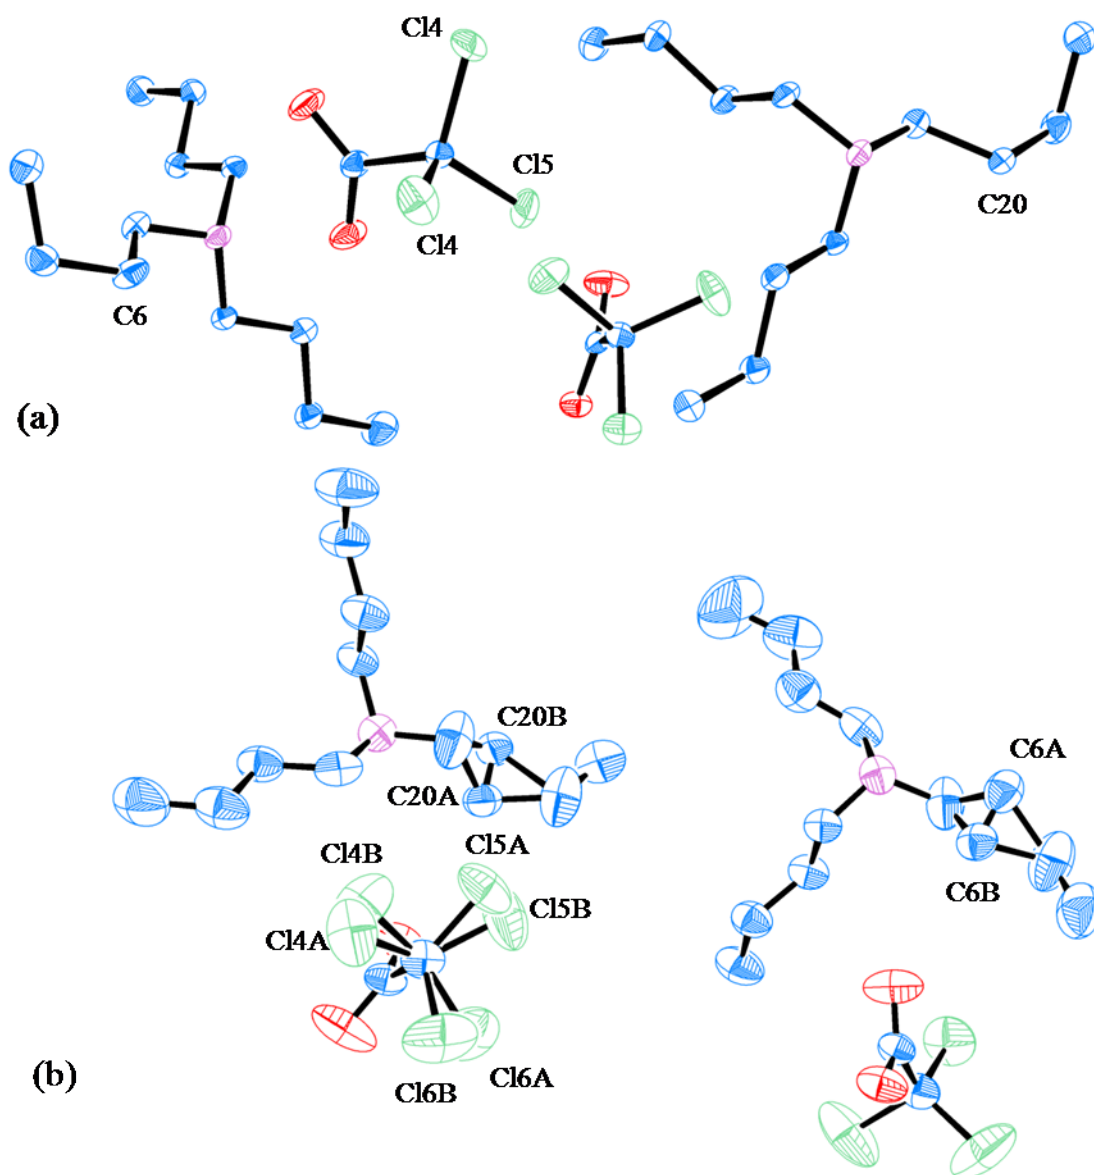

**Figure S5.** Thermal ellipsoidal view of TBAT at (a) 100 K and (b) at 220 K after splitting of appropriate atoms.

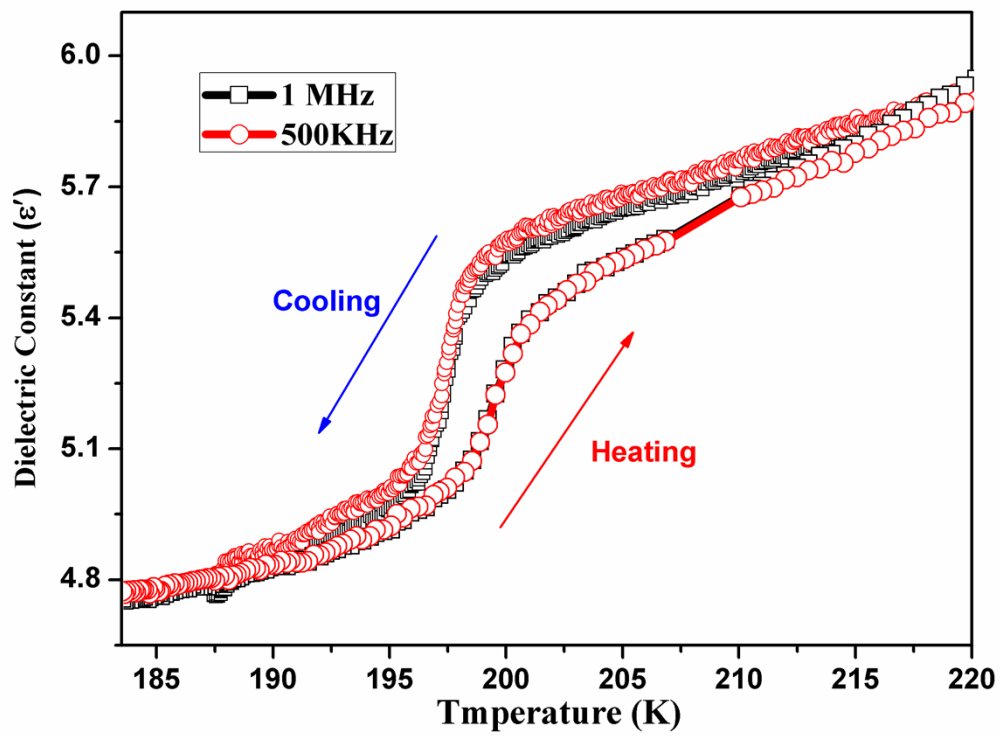

**Figure S6.** Temperature dependent cycle of dielectric constant of TBAT at 1 MHz and 500 KHz.

**Table S1.**Crystal Data and structure refinement details of **TBAT** at 100 and 220 K.

| Sum formula                             | C14 H28 Cl3 N O2 | C14 H28 Cl3 N O2 |
|-----------------------------------------|------------------|------------------|
| Formula weight                          | 348.72           | 348.72           |
| Temperature (K)                         | 100              | 220              |
| Crystal system                          | Triclinic        | Triclinic        |
| Space group                             | $P\bar{1}$       | $P\bar{1}$       |
| $a/\text{\AA}$                          | 9.6337           | 9.6704           |
| $b/\text{\AA}$                          | 10.7137          | 10.5407          |
| $c/\text{\AA}$                          | 18.8281          | 19.7334          |
| $\alpha/\text{deg}$                     | 98.742           | 98.677           |
| $\beta/\text{deg}$                      | 100.488          | 101.66           |
| $\gamma/\text{deg}$                     | 100.213          | 98.350           |
| Volume ( $\text{\AA}^3$ )               | 1846.15          | 1915.04          |
| $Z$                                     | 2                | 2                |
| $D_{\text{calcd}}$ , $\text{g cm}^{-3}$ | 1.255            | 1.031            |
| $F(000)$                                | 744              | 744              |
| Completeness (%)                        | 98.3             | 99.8 %           |
| Goodness-of-fit on $F^2$                | 1.038            | 1.056            |
| $R_1$ (on $F_o^2$ , $I > 2\sigma(I)$ )  | 0.0492           | 0.0652           |
| $wR_2$ (on $F_o^2$ , $I > 2\sigma(I)$ ) | 0.1265           | 0.2573           |



**Table S2.** Hydrogen-bond geometry (Å, deg) at 100 and 220 K in **TBAT**.

| <b>100K</b> | D—H  | H···A | D···A     | D—H···A |
|-------------|------|-------|-----------|---------|
| N1—H1...O1  | 0.93 | 1.79  | 2.716 (3) | 170.5   |
| N2—H2...O4  | 0.93 | 1.75  | 2.677 (3) | 171.1   |
| <b>220K</b> | D—H  | H···A | D···A     | D—H···A |
| N1—H1...O1  | 0.93 | 1.77  | 2.699 (3) | 170.5   |
| N2—H2...O4  | 0.93 | 1.81  | 2.738 (3) | 171.1   |

**Table S3.** *U*<sub>eq</sub> values of **TBAT** at 220 K.

| Atoms | <i>U</i> (equiv) | Atoms | <i>U</i> (equiv) |
|-------|------------------|-------|------------------|
| C1    | 0.064            | C15   | 0.052            |
| C2    | 0.072            | C16   | 0.062            |
| C3    | 0.100            | C17   | 0.072            |
| C4    | 0.178            | C18   | 0.098            |
| C5    | 0.081            | C19   | 0.093            |
| C7    | 0.100            | C21   | 0.102            |
| C8    | 0.100            | C22   | 0.117            |
| C9    | 0.048            | C23   | 0.057            |
| C10   | 0.054            | C24   | 0.062            |
| C11   | 0.061            | C25   | 0.082            |
| C12   | 0.080            | C26   | 0.101            |
| C13   | 0.055            | C27   | 0.051            |
| C14   | 0.065            | C28   | 0.061            |
| N1    | 0.052            | N2    | 0.050            |
| O1    | 0.063            | O3    | 0.061            |
| O2    | 0.083            | O4    | 0.981            |
| Cl1   | 0.133            | Cl2   | 0.133            |
| Cl3   | 0.093            |       |                  |
